# Supplementary material for: Analysis of Minor Proteins Present in Breast Milk by Using WGA Lectin
Source: MDPI journal article supplement (doi:10.3390/children9071084), 2022-07-20
Supplement: s1 [file s1]

**Supplementary Table S1:** Proteins identified by mass spectrometry in each of the samples. Protein names, Uniprot database access number, score (detection reliability) and coverage (% of protein sequence detected) are shown.

| PROTEIN                                                          |               |  | WHOLE SERUM   |       |               |       |               |       | WGA LECTIN    |       |               |       |               |       |
|------------------------------------------------------------------|---------------|--|---------------|-------|---------------|-------|---------------|-------|---------------|-------|---------------|-------|---------------|-------|
|                                                                  |               |  | 5 months of   |       | 12 months of  |       | 18 months of  |       | 5 months of   |       | 12 months of  |       | 18 months of  |       |
|                                                                  |               |  | breastfeeding |       | breastfeeding |       | breastfeeding |       | breastfeeding |       | breastfeeding |       | breastfeeding |       |
| Name                                                             | Access number |  | Score         | Cov   |
| 1 Actin, cytoplasmic 1                                           | P60709        |  | 43.68         | 6.40  |               |       | 62.03         | 14.40 |               |       |               |       |               |       |
| 2 Alpha-1-acid glycoprotein 1                                    | P02763        |  |               |       |               |       |               |       | 16.48         | 7.40  | 31.40         | 10.90 |               |       |
| 3 Alpha-1-antichymotrypsin                                       | P01011        |  | 144.10        | 23.80 | 94.06         | 32.60 | 145.95        | 29.00 | 71.69         | 28.70 | 63.41         | 10.80 |               |       |
| 4 Alpha-1-antitrypsin                                            | P01009        |  | 21.35         | 5.00  |               |       | 23.96         | 4.00  |               |       |               |       |               |       |
| 5 Alpha-2-HS-glycoprotein                                        | C9JV77        |  | 26.03         | 7.30  |               |       |               |       |               |       |               |       |               |       |
| 6 Alpha-amylase 1                                                | P04745        |  |               |       |               |       |               |       | 14.73         | 2.30  |               |       | 12.43         | 2.10  |
| 7 Alpha-lactalbumin                                              | P00709        |  | 431.63        | 83.00 | 212.77        | 48.50 | 361.28        | 80.20 | 197.10        | 38.70 | 50.30         | 23.90 | 136.35        | 44.30 |
| 8 Alpha-N-acetylgalactosaminide<br>alpha-2,6-sialyltransferase 1 | G3XAD9        |  |               |       |               |       | 11.33         | 1.40  | 10.13         | 2.10  |               |       | 8.66          | 2.10  |
| 9 Alpha-S1-casein                                                | P47710        |  | 268.07        | 58.30 | 85.67         | 27.60 | 204.62        | 47.50 | 179.59        | 48.10 | 108.53        | 30.20 | 104.35        | 25.90 |
| 10 Apolipoprotein A-I                                            | P02647        |  | 291.41        | 68.50 |               |       | 139.53        | 39.70 | 27.29         | 13.40 | 11.67         | 4.10  | 10.51         | 4.10  |

|    |                                    |        |        |       |        |       |        |       |        |       |        |       |        |       |
|----|------------------------------------|--------|--------|-------|--------|-------|--------|-------|--------|-------|--------|-------|--------|-------|
| 11 | Apolipoprotein A-II                | P02652 | 75.10  | 42.00 | 24.51  | 17.00 | 35.36  | 22.00 |        |       |        |       |        |       |
| 12 | Apolipoprotein E                   | H0Y7L5 | 32.70  | 8.90  |        |       | 11.43  | 4.10  |        |       |        |       |        |       |
| 13 | Beta-1,4-galactosyltransferase 1   | P15291 | 90.98  | 18.80 |        |       | 84.53  | 21.80 | 34.13  | 4.70  | 10.83  | 2.70  |        |       |
| 14 | Beta-2-microglobulin               | P61769 | 40.41  | 31.90 |        |       | 58.64  | 28.70 |        |       |        |       |        |       |
| 15 | Beta-casein                        | P05814 | 251.88 | 91.50 | 131.82 | 60.10 | 209.01 | 90.70 | 192.96 | 83.10 | 119.64 | 53.50 | 102.99 | 34.50 |
| 16 | Bile salt-activated lipase         | P19835 | 528.67 | 34.50 | 246.12 | 24.90 | 468.65 | 35.50 | 617.27 | 43.80 | 504.34 | 37.10 | 385.73 | 34.50 |
| 17 | Butyrophilin subfamily 1 member A1 | Q13410 | 247.76 | 27.70 | 92.33  | 14.80 | 149.71 | 23.50 | 63.27  | 8.70  | 114.10 | 15.50 | 14.68  | 2.40  |
| 18 | Carbonic anhydrase 6               | P23280 |        |       |        |       | 12.92  | 2.90  | 32.00  | 12.30 |        |       | 8.82   | 2.90  |
| 19 | C-C motif chemokine 28             | D6RC73 | 8.00   | 18.70 |        |       | 22.33  | 18.70 | 14.86  | 18.70 | 13.41  | 18.70 | 17.72  | 18.70 |
| 20 | Chordin-like protein 2             | Q6WN34 | 109.76 | 25.10 |        |       | 73.30  | 16.00 | 98.07  | 29.10 | 16.45  | 16.40 |        |       |
| 21 | Clusterin                          | P10909 | 354.62 | 36.50 | 147.79 | 23.30 | 345.59 | 36.50 | 240.54 | 32.90 | 261.04 | 34.20 | 138.11 | 23.60 |
| 22 | Complement C3                      | P01024 | 213.07 | 9.30  | 33.59  | 1.70  | 55.91  | 3.40  |        |       |        |       |        |       |
| 23 | Complement C4-B                    | P0C0L5 | 363.80 | 19.20 | 194.26 | 9.90  | 272.73 | 16.90 |        |       | 224.71 | 13.60 |        |       |
| 24 | Cystatin-C                         | P01034 | 73.91  | 34.90 |        |       | 39.97  | 23.20 |        |       |        |       |        |       |
| 25 | E3 ubiquitin-protein ligase MYCBP2 | O75592 |        |       |        |       |        |       |        |       |        |       | 22.69  | 0.40  |
| 26 | Elongation factor 1-alpha 1        | P68104 |        |       |        |       | 26.30  | 7.90  |        |       |        |       |        |       |

|    |                                                     |        |        |       |       |       |        |       |        |       |        |       |        |       |
|----|-----------------------------------------------------|--------|--------|-------|-------|-------|--------|-------|--------|-------|--------|-------|--------|-------|
| 27 | Endoplasmic reticulum chaperone BiP                 | P11021 |        |       |       |       | 40.99  | 5.30  |        |       |        |       |        |       |
| 28 | Ezrin                                               | E7EQR4 | 9.42   | 1.50  |       |       | 12.48  | 1.10  |        |       |        |       |        |       |
| 29 | Fatty acid synthase                                 | P49327 | 162.51 | 7.10  | 30.85 | 1.70  | 606.26 | 21.80 | 21.84  | 1.00  | 52.72  | 2.50  | 44.26  | 1.60  |
| 30 | Fibroblast growth factor-binding protein 1          | Q14512 | 17.67  | 6.40  |       |       | 13.63  | 6.40  |        |       | 12.66  | 3.80  |        |       |
| 31 | Follistatin-related protein 1                       | Q12841 | 61.36  | 14.20 |       |       |        |       |        |       |        |       |        |       |
| 32 | Galectin-3-binding protein                          | Q08380 | 24.39  | 5.10  |       |       | 48.94  | 7.50  | 14.13  | 2.90  |        |       | 12.76  | 9.70  |
| 33 | Gelsolin                                            | P06396 |        |       | 13.09 | 0.90  | 18.67  | 2.40  |        |       |        |       |        |       |
| 34 | Haptoglobin                                         | P00738 | 33.70  | 8.10  |       |       | 26.27  | 7.10  | 92.19  | 27.00 |        |       | 10.70  | 4.20  |
| 35 | Heat shock 70 kDa protein 1B                        | P0DMV9 | 18.61  | 1.70  |       |       |        |       |        |       |        |       |        |       |
| 36 | Hemopexin                                           | P02790 |        |       |       |       | 14.92  | 5.10  | 10.51  | 2.80  | 32.70  | 9.70  |        |       |
| 37 | Hydroxyacyl-coenzyme A dehydrogenase, mitochondrial | Q16836 | 9.95   | 2.50  | 10.66 | 2.50  | 12.29  | 2.50  |        |       | 8.49   | 2.50  |        |       |
| 38 | Immunoglobulin heavy constant alpha 1               | P01876 | 282.52 | 55.50 | 91.95 | 15.00 | 249.07 | 51.50 | 219.93 | 39.60 | 246.33 | 47.70 | 180.05 | 27.80 |
| 39 | Immunoglobulin heavy constant gamma 1               | P01857 |        |       |       |       | 29.97  | 7.00  |        |       |        |       | 14.24  | 4.00  |

|    |                                                         |            |        |       |       |       |        |       |        |       |        |       |        |       |
|----|---------------------------------------------------------|------------|--------|-------|-------|-------|--------|-------|--------|-------|--------|-------|--------|-------|
| 40 | Immunoglobulin heavy constant mu                        | P01871     | 17.36  | 5.00  | 29.37 | 5.00  | 22.06  | 5.00  | 11.06  | 1.60  | 16.46  | 4.60  |        |       |
| 41 | Immunoglobulin heavy variable 3/OR16-9 (non-functional) | A0A0B4J2B5 |        |       |       |       |        |       | 14.28  | 18.30 | 22.69  | 18.30 | 21.93  | 18.30 |
| 42 | Immunoglobulin J chain                                  | P01591     | 138.94 | 44.60 | 23.45 | 17.10 | 116.67 | 42.10 | 126.73 | 43.30 | 85.41  | 35.20 | 47.46  | 22.20 |
| 43 | Immunoglobulin kappa constant                           | P01834     |        |       | 62.02 | 48.50 | 68.12  | 55.10 | 119.28 | 87.80 | 136.90 | 79.40 | 109.37 | 55.10 |
| 44 | Immunoglobulin kappa variable 3-20                      | P01619     |        |       |       |       |        |       | 10.87  | 7.70  | 26.30  | 19.80 |        |       |
| 45 | Immunoglobulin kappa variable 3D-15                     | A0A087WSY6 |        |       |       |       | 9.52   | 6.00  |        |       |        |       |        |       |
| 46 | Immunoglobulin kappa variable 3D-20                     | A0A0C4DH25 |        |       |       |       | 8.37   | 6.00  |        |       |        |       |        |       |
| 47 | Immunoglobulin kappa variable 3D-7                      | A0A075B6H7 |        |       |       |       |        |       | 13.08  | 7.70  |        |       |        |       |
| 48 | Immunoglobulin lambda constant 2                        | P0DOY2     | 39.41  | 30.10 | 35.61 | 27.30 | 63.63  | 48.10 | 86.34  | 66.90 |        |       | 53.72  | 49.00 |
| 49 | Immunoglobulin lambda-like polypeptide 5                | B9A064     |        |       | 14.49 | 4.60  |        |       |        |       | 98.62  | 34.40 |        |       |
| 50 | Insulin-like growth factor-binding protein 2            | P18065     | 53.16  | 12.60 |       |       | 34.18  | 10.70 |        |       |        |       |        |       |
| 51 | Kallikrein-6                                            | Q92876     |        |       |       |       | 25.34  | 9.40  |        |       |        |       |        |       |

|    |                                       |            |         |       |        |       |         |       |        |       |        |       |        |       |
|----|---------------------------------------|------------|---------|-------|--------|-------|---------|-------|--------|-------|--------|-------|--------|-------|
| 52 | Kappa-casein                          | P07498     | 153.59  | 69.70 | 113.70 | 54.30 | 139.05  | 67.50 | 140.07 | 56.00 | 70.21  | 32.40 | 100.96 | 40.60 |
| 53 | Keratin, type I cytoskeletal 9        | P35527     |         |       |        |       | 11.82   | 5.80  | 11.98  | 1.40  |        |       | 11.82  | 1.50  |
| 54 | Keratin, type II cytoskeletal 1       | P04264     |         |       |        |       | 60.94   | 6.60  | 68.52  | 9.00  |        |       | 109.73 | 12.40 |
| 55 | Lactadherin                           | Q08431     | 36.81   | 8.70  | 17.70  | 3.20  | 39.31   | 10.40 | 65.94  | 15.10 | 82.90  | 21.20 | 41.28  | 10.40 |
| 56 | Lactoperoxidase                       | P22079     | 38.78   | 4.00  |        |       |         |       | 12.52  | 0.80  |        |       |        |       |
| 57 | Lactotransferrin                      | P02788     | 1383.92 | 80.70 | 614.08 | 51.10 | 1164.42 | 80.20 | 962.86 | 68.30 | 612.07 | 55.80 | 427.74 | 38.30 |
| 58 | Leucine-rich alpha-2-glycoprotein     | P02750     |         |       | 31.64  | 12.10 |         |       |        |       | 14.69  | 4.60  |        |       |
| 59 | Lipoprotein lipase                    | P06858     | 142.43  | 19.70 |        |       | 45.89   | 7.10  | 143.82 | 29.20 | 34.46  | 7.10  |        |       |
| 60 | Lysozyme C                            | P61626     | 168.57  | 62.10 | 39.60  | 27.00 | 156.75  | 72.20 | 65.44  | 29.70 | 33.80  | 27.00 | 12.94  | 8.70  |
| 61 | Macrophage mannose receiver 1         | P22897     | 87.21   | 5.60  |        |       | 199.70  | 11.80 | 227.75 | 14.00 | 119.60 | 7.70  | 180.59 | 11.40 |
| 62 | Metalloproteinase inhibitor 1         | H0Y789     | 28.58   | 26.60 |        |       | 28.93   | 26.60 |        |       |        |       |        |       |
| 63 | Monocyte differentiation antigen CD14 | P08571     | 204.81  | 44.00 | 57.70  | 13.00 | 247.50  | 49.80 | 93.60  | 23.70 | 110.24 | 23.40 | 33.38  | 17.30 |
| 64 | Mucin-1                               | P15941     | 30.54   | 9.60  | 13.88  | 7.40  | 34.33   | 12.20 |        |       | 13.55  | 7.40  |        |       |
| 65 | Nucleobindin 2, isoform CRA_b         | A0A087WSV8 | 60.67   | 19.70 |        |       | 79.91   | 16.40 |        |       |        |       |        |       |
| 66 | Nucleobindin-1                        | Q02818     | 56.74   | 10.40 |        |       | 42.67   | 8.40  |        |       |        |       |        |       |
| 67 | Osteopontin                           | P10451     | 137.27  | 49.60 | 147.59 | 40.70 | 293.25  | 63.60 |        |       | 90.57  | 23.20 | 90.62  | 23.20 |

|    |                                              |        |        |       |        |       |        |       |        |       |        |       |        |       |
|----|----------------------------------------------|--------|--------|-------|--------|-------|--------|-------|--------|-------|--------|-------|--------|-------|
| 68 | Peptidyl-prolyl cis-trans isomerase B        | P23284 | 28.42  | 10.60 |        |       | 27.32  | 10.10 |        |       |        |       |        |       |
| 69 | Perilipin-2                                  | Q99541 | 21.17  | 4.30  | 31.28  | 5.00  | 11.02  | 2.90  |        |       |        |       |        |       |
| 70 | Plasma protease C1 inhibitor                 | P05155 | 18.05  | 1.80  |        |       |        |       | 71.01  | 14.60 | 41.26  | 6.80  |        |       |
| 71 | Plasma serine protease inhibitor             | P05154 |        |       | 24.10  | 7.30  |        |       |        |       |        |       |        |       |
| 72 | Polymeric immunoglobulin receptor            | P01833 | 620.30 | 42.50 | 300.22 | 25.90 | 716.26 | 52.00 | 510.02 | 38.00 | 444.13 | 36.10 | 365.48 | 30.30 |
| 73 | Polyubiquitin-B                              | B4DV12 |        |       |        |       |        |       |        |       | 25.32  | 16.30 |        |       |
| 74 | POT ankyrin domain family member F           | A5A3E0 |        |       |        |       |        |       | 11.77  | 1.00  |        |       |        |       |
| 75 | Prosaposin                                   | C9JIZ6 | 27.82  | 5.50  | 29.78  | 5.50  | 38.93  | 7.20  | 8.30   | 8.30  | 52.60  | 4.90  | 13.84  | 8.30  |
| 76 | Prothrombin                                  | C9JV37 | 21.12  | 5.80  |        |       |        |       |        |       |        |       |        |       |
| 77 | Serotransferrin                              | P02787 | 87.52  | 11.00 |        |       | 104.77 | 13.70 |        |       |        |       |        |       |
| 78 | Serum albumin                                | P02768 | 745.51 | 71.20 | 89.89  | 9.60  | 588.59 | 58.10 | 72.45  | 9.60  |        |       | 89.09  | 12.20 |
| 79 | Sulfhydryl oxidase 1                         | O00391 | 20.68  | 1.70  | 10.36  | 0.90  | 71.07  | 11.30 | 121.73 | 13.60 | 197.19 | 21.60 | 69.05  | 7.40  |
| 80 | Transcobalamin-1                             | P20061 | 9.25   | 1.80  | 24.50  | 3.60  | 97.27  | 18.40 |        |       |        |       |        |       |
| 81 | UTP--glucose-1-phosphate uridylyltransferase | Q16851 | 9.91   | 1.70  | 11.43  | 3.70  |        |       |        |       |        |       |        |       |

|    |                                |        |       |      |        |       |       |      |        |       |
|----|--------------------------------|--------|-------|------|--------|-------|-------|------|--------|-------|
| 82 | Vitamin D-binding protein      | D6RF35 | 49.60 | 7.30 | 12.17  | 6.30  | 24.77 | 2.70 |        |       |
| 83 | Vitronectin                    | P04004 | 13.80 | 3.10 |        |       | 47.46 | 7.70 | 16.54  | 3.10  |
| 84 | Xanthine dehydrogenase/oxidase | P47989 |       |      | 247.65 | 17.90 | 18.28 | 1.40 | 211.35 | 14.40 |
